# Supplementary material
Source: MDPI journal article supplement (https://www.mdpi.com/1424-2818/15/7/825)
Supplement: s1 [file s1 › diversity-2365395-supplementary.pdf]

Lekima K. F. Copeland

Discipline of Marine Studies

School of Agriculture, Geography, Environment, Ocean, and Natural Sciences

The University of the South Pacific

S11021517@student.usp.ac.fj

Dr. Moreira da Costa Luis

Diversity MDPI

Dear Dr. Moreira da Costa Luis,

**Subject: Revised Manuscript Submission - Response to Reviewer Comments**

We are pleased to submit the revised version of our manuscript titled " *Exploring the Research Landscape of Endemic Catadromous Fishes: A Comprehensive Bibliometric Study and PRISMA Review*. We have carefully addressed all the comments raised by the three reviewers and you as an editor. We incorporated the necessary revisions in our manuscript.

We believe that we have adequately addressed all the reviewers' comments and incorporated the necessary revisions to improve the quality and clarity of our manuscript. We remain confident that our revised manuscript meets the standards of *Diversity* and is suitable for publication in this special issue.

Thank you for your consideration of our revised manuscript. We appreciate the opportunity to respond to the reviewers' comments, and we look forward to hearing from you regarding the outcome of this submission. Should you require any further information or clarification, please do not hesitate to contact me.

Sincerely,

*Lekima Copeland*

Lekima Copeland

Ph.D. Candidate

School of Agriculture, Geography, Environment, Ocean, and Natural Sciences
